# Supplementary material
Source: publisher figshare collection journal article supplement (https://karger.figshare.com/ndownloader/files/36007508)
Supplement: Supplementary file 1 [file 36007508]

Supplementary Table 1.Summary of malignant neoplasms per MSRSGC categories with histologic follow-up

| **Category** | **Histologic follow-up** |
| --- | --- |
| ND (n=13)  NN (n=1)  AUS (n=6)  BN (n=4)  SUMP (n=20)  SM (n=9)  M (n=24) | MEC= 6  ACC=4  Lymphoma = 2  Adenocarcinoma, NOS= 1  Lymphoma = 1  Metastatic SCC = 3  MEC=2  Lymphoma = 1  CAEXPA = 2  MEC = 2  MEC=6  CAEXPA= 4  EMC= 2  Myoepithelial carcinoma = 2  Cribriform cystadenocarcinoma = 1  AdCC = 1  Salivary duct carcinoma = 1  ACC= 1  Dermatofibroma protuberans =1  Polymorphous adenocarcinoma= 1  Metastatic SCC =2  MEC =2  Adenocarcinoma, NOS =2  ACC= 1  PDCA = 1  Lymphoma = 1  ACC = 6  Adenocarcinoma, NOS =3  MEC=2  AdCC= 2  CAEXPA = 2  Metastatic SCC =2  Metastatic melanoma =2  Metastatic Merkel cell carcinoma = 2  Salivary duct carcinoma =1  Lymphoma = 1  Metastatic fibrosarcoma =1 |

Abbreviations: ND, non-diagnostic; NN, non-neoplastic; AUS, atypia of undetermined significance; BN, benign neoplasm; SUMP, salivary gland neoplasm of uncertain malignant potential; SM, suspicious for malignancy; M, malignant; MEC, mucoepidermoid carcinoma; ACC, acinic cell carcinoma; AdCC: adenoid cystic carcinoma; NOS, not otherwise specified; SCC, squamous cell carcinoma; CAEXPA, carcinoma ex pleomorphic adenoma; EMC, epithelial-myoepithelial carcinoma.

Supplementary Table 2. Summary of benign neoplasms per MSRSGC categories with histologic follow-up

| **Category** | **Histologic follow up** |
| --- | --- |
| ND (n=35)  NN (n=0)  AUS (n=26)  BN (n= 171)  SUMP (n= 18)  SM (n=3)  M (n=0) | WT = 16  PA = 13  Basal cell adenoma = 2  Cystadenoma = 4  None  WT = 15  PA = 7  Oncocytoma = 2  Myxoma = 1  Sebaceous lymphadenoma =1  PA = 130  WT = 31  Basal cell adenoma = 4  Monomorphic adenoma = 2  Atypical PA = 2  Oncocytoma = 1  Schwannoma = 1  PA = 12  Basal cell adenoma = 2  WT =2  Myoepithelioma = 1  Oncocytoma = 1  PA = 2  WT =1  None |

Abbreviations: ND, non-diagnostic; NN, non-neoplastic; AUS, atypia of undetermined significance; BN, benign neoplasm; SUMP, salivary gland neoplasm of uncertain malignant potential; SM, suspicious for malignancy; WT, Warthin tumor; PA, pleomorphic adenoma.
